# Supplementary material for: Contextual modifiers of healthspan, lifespan, and epigenome in mice under chronic social stress
Source: PubMed Central journal article supplement — Proc Natl Acad Sci U S A. 2023 Apr 12;120(16):e2211755120. doi: 10.1073/pnas.2211755120 (PMC10120026; doi:10.1073/pnas.2211755120), 2023-04-12
Supplement: pnas.2211755120.sapp.pdf [file pnas.2211755120.sapp.pdf]

## Supporting Information for

Contextual modifiers of healthspan, lifespan and epigenome in mice under chronic social stress

Maria Razzoli, Kewir Nyuyki-Dufe, Brian H. Chen, Alessandro Bartolomucci

Alessandro Bartolomucci

Email: [abartolo@umn.edu](mailto:abartolo@umn.edu)

## This PDF file includes:

Supporting text

Figures S1 to S6

Tables S1 to S9

SI References

## **Supporting Information Text**

### **Supporting Methods**

#### **Diets**

As previously described (1) after the first week of CPS, half the dyads were randomized to the standard of the high fat diet using a simple randomization procedure of flipping a coin. After the conclusion of the CPS phase, the mice entered the aging phase of the study during which, all mice were fed standard diet. Finally, from the age of 10 months, all mice were switched to the mature rodent maintenance diet (D10012M) because of its better balance of essential nutrients tailored for aged rodents.

#### **DNA methylation sample preparation**

DNA was purified from the liver tissue using the Qiagen's DNAeasy Blood & Tissue kit (<http://qiagen.com>) on the QIAcube system. Nucleic acid quality was checked using a NanoDrop spectrophotometer (<http://www.nanodrop.com>). As a reference, a control mouse sample external to this experiment was also included.

#### **DNA methylation and array processing**

The DNA methylation assay was performed at the University of Minnesota Genomics Center (<https://genomics.umn.edu/>) according to the standard manufacturer's protocol (<http://illumina.com/>). Raw intensity data files (.idat files) were processed using either the GenomeStudio software (Illumina, San Diego, CA) or the R package SeSAMe (version 1.2.4). GenomeStudio (2011.1) was used to preprocess the raw data and evaluate the performance of the Illumina Illumina BeadChip kit (Avg Loci Detection: 99.8%; Avg P95 Green: 8771; Avg P95 Red: 12187; % Loci Detection of Control Sample: 99.56%). In all, genome-wide DNA methylation profiling returned 287,050 total targets from our samples, of which 284,860 CpG probes were retained after processing to remove any CpH methylation sites, SNPs, or unknown regions due to their low representation in our samples. Furthermore, we also excluded CpG loci which had missing data for > 5% of individuals in the sample. We then used GenomeStudio to obtain the intensity and  $\beta$ -values on the full set of 284,860 identified cg probes with color correction/background subtracted preprocessing. For analytical purposes, we also excluded any CpG loci with missing data for > 5% of individuals in the sample. The methylation status for each probe was recorded as a  $\beta$ -value that ranged between 0 and 1, where values close to 1 represent high levels of methylation and where values close to 0 represent low levels of methylation. Annotations of CpG markers are obtained from Illumina's annotation file and enhanced annotation to the UCSC Known Gene. All annotations use the mouse June 2020 (GRCm39/mm39) assembly.

#### **Statistical design and analysis**

Throughout this manuscript we are interested in assessing causal effects of variables including both treatment assignment, which can be randomized, and postulated mediating variables including behaviors, anatomical changes, and physiologic changes. Only those variables to which we can randomly assign experimental units

are variables for which we can confidently make causal inferences. Yet at the same time, while we only definitively estimate associations with other variables, including those aforementioned postulated mediating variables, we are indeed doing so with the hope of assessing their causal effects. Thus, any use of causal language on our part may be interpreted as a strong indicator of causal effects in the case of the randomized treatment assignments we use and as postulated or suggested causal effects inferred from associations in other cases. Analyses were performed using R (2021.09.1 Build 372 © 2009-2021) or Statistica 13.0 (Dell Inc., Tulsa, OK). Data are expressed as means  $\pm$  standard error of the mean, unless otherwise specified.

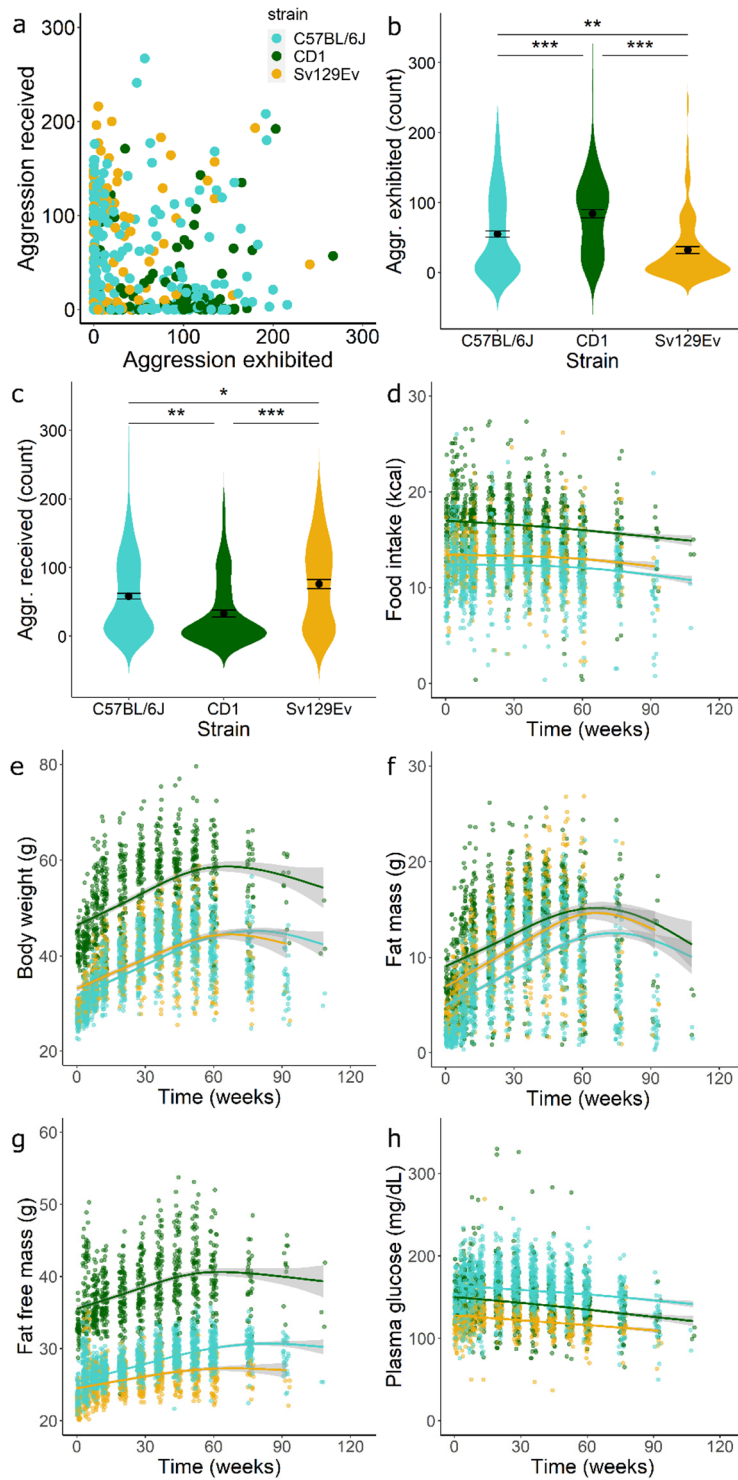

**Figure S1.** Characterization of C57BL/6J, CD1, and Sv129Ev male mice in the LCPS protocol. a) Scatterplot of contextual aggression exhibited and received during the course of the CPS phase of the protocol by all mice. Distribution of the aggression exhibited (b) or received (c) within each strain, indicating average and standard error of group means. (d-h) Healthspan profiling of each strain, as illustrated by individual values as well as solid lines representing “loess” smoothing method and grey areas represent 95% confidence intervals around smoothing for the entire duration of the study, and including food intake (d), body weight (e), fat mass (f), fat free mass (g), plasma glucose after 4h fasting (h). Asterisks represent significant differences from ANOVA with pairwise comparisons tested with Tukey’s HSD test, \*  $p < 0.05$ , \*\*  $p < 0.01$ , \*\*\*  $p < 0.001$ .

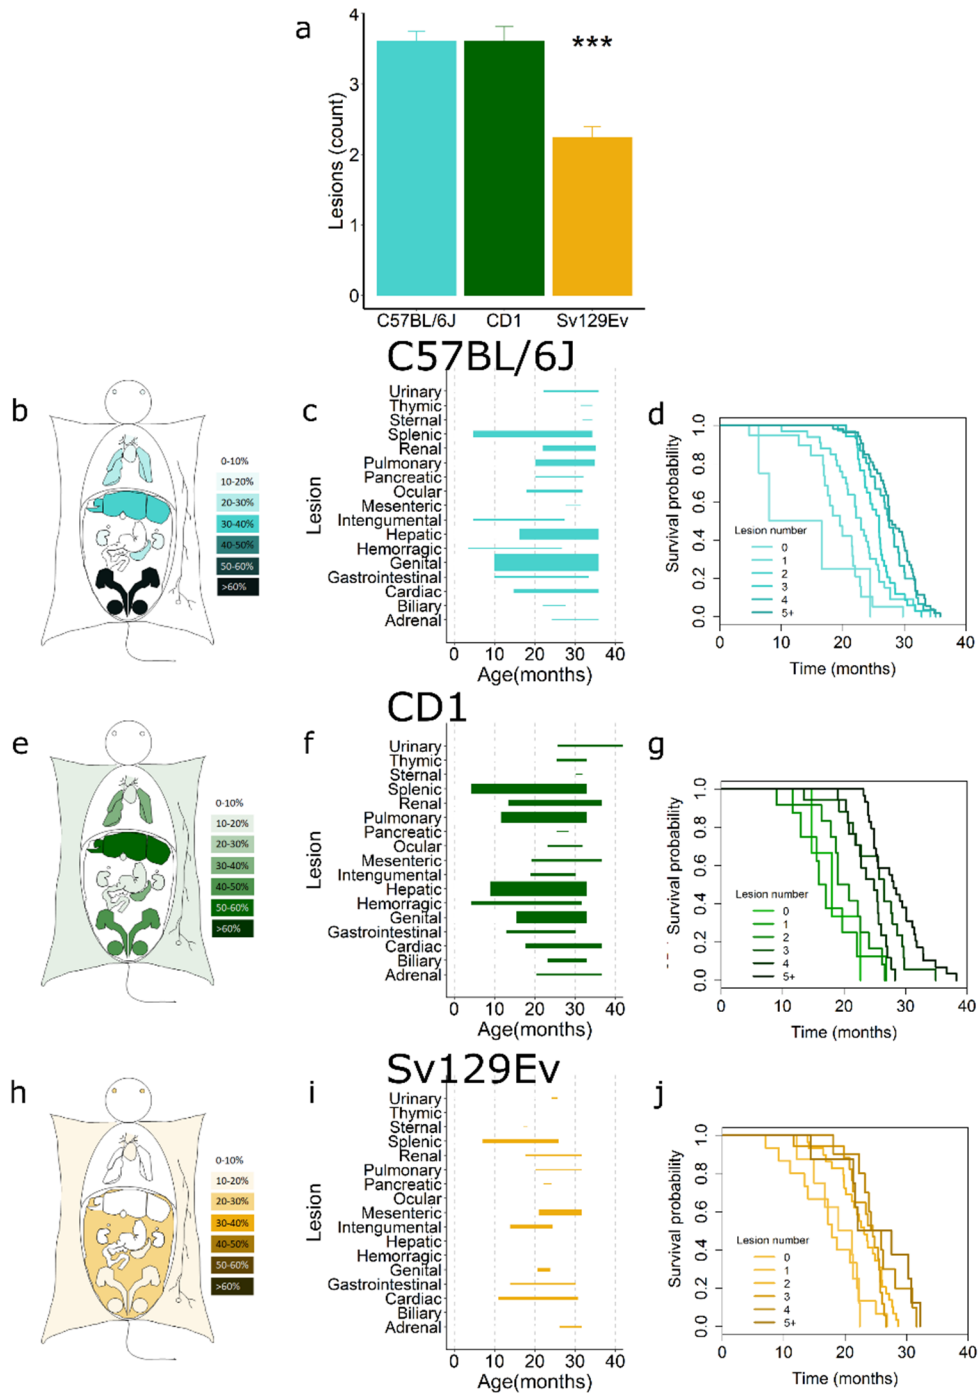

**Figure S2.** Mouse strain association with lesion burden, onset of aging-associated organ lesion, and lesion-dependent mortality. a) The number of lesions was significantly dependent on genetic strain ( $F(2,334)=18.5$ ,  $p<0.001$ ,  $\eta_p^2=0.098$ , obs. power=0.999), with Sv129Ev mice developing a significantly lower number of lesions detectable at necropsy (Pair-wise comparisons: Sv129Ev-C57BL/6J:  $-1.37$ ,  $CI=(-1.93, -0.80)$ ,  $p<0.001$ ; Sv129Ev-CD1:  $-1.37$ ,  $CI=(-2.02, -0.72)$ ,  $p<0.001$ ). b-j) Heat-map of organ specific lesions, strain- and age-dependent distribution of macroscopic dissectible lesions in proportion to their prevalence within each organ within each strain, and strain survival probability as a function of the number of lesions detectable at necropsy in C57BL/6J (b-d), CD1 (e-g), and Sv129Ev mice (h-j). Data in (a) represent group mean  $\pm$  standard error of mean. P-value represents level of significance in both pair-wise comparisons (Tukey's HSD test).

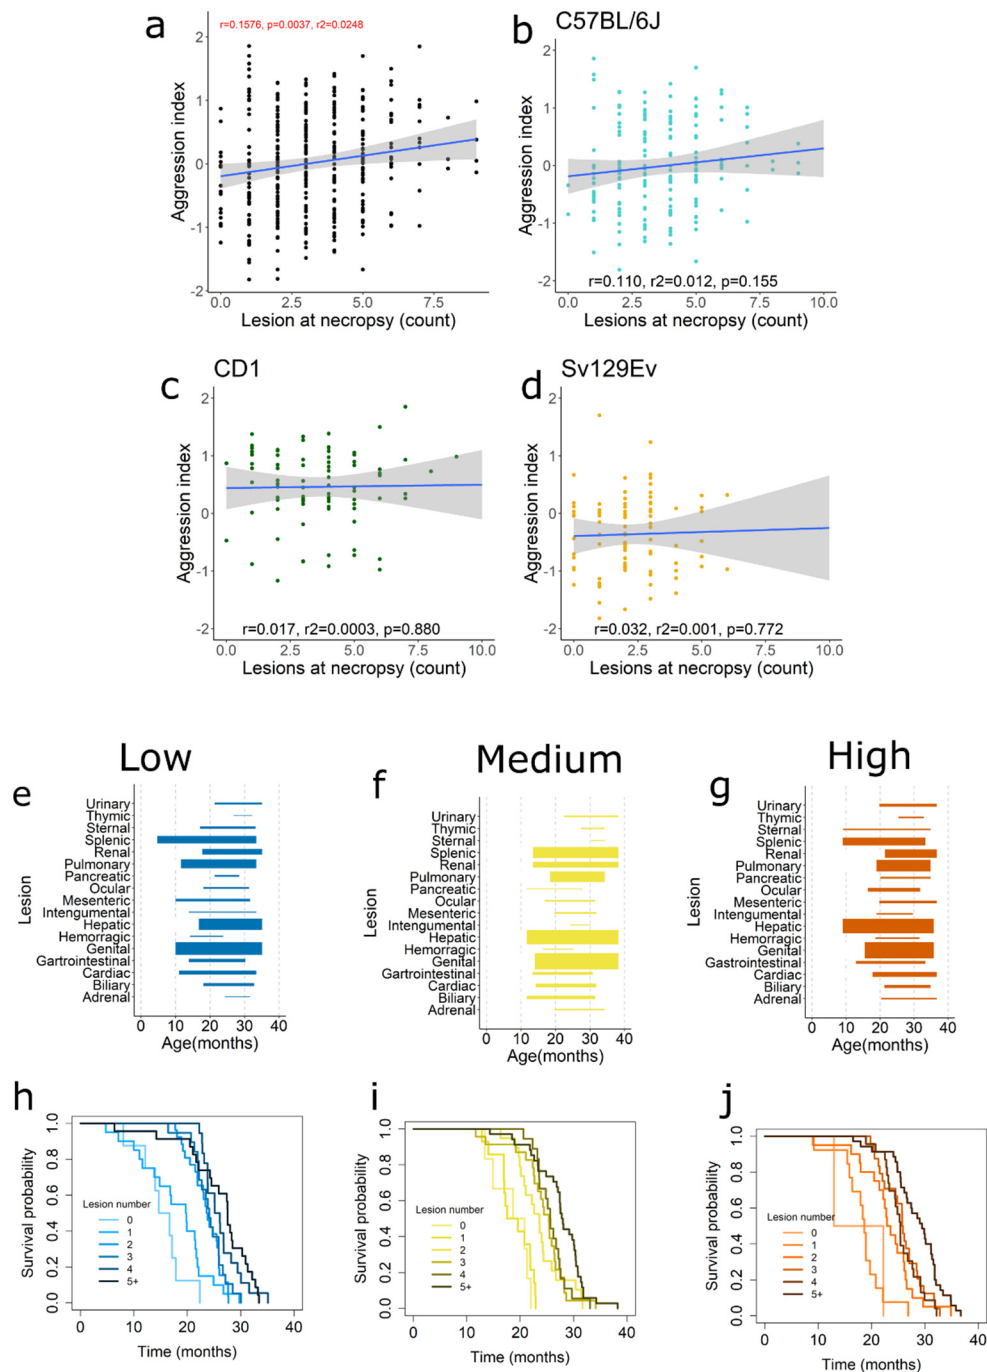

**Figure S3.** Aggression index association with lesion burden, onset of aging-associated organ lesion, and lesion-dependent mortality. a) Scatterplot of the correlation of the aggression index and number of lesions at necropsy in the general population (a), and within C57BL/6J (b), CD1 (c), and Sv129Ev (d) mice. e-g) DAI- and age-dependent distribution of macroscopic dissectible lesions in proportion to their prevalence within each organ within each of the DAI level. Within each strain, DAI significantly affected the number of lesions within C57BL/6J (low= $3.09 \pm 0.25$ , medium= $3.86 \pm 0.25$ , high= $3.84 \pm 0.25$ ,  $F(2,165)=3.01$ ,  $p=0.048$ ), but not within CD1 (low= $3.42 \pm 0.55$ , medium= $3.87 \pm 0.39$ , high= $3.53 \pm 0.27$ ,  $F(2,81)=0.32$ ,  $p=0.728$ ) or Sv129Ev mice (low= $2.23 \pm 0.23$ , medium= $2.25 \pm 0.07$ , high= $2.22 \pm 0.50$ ,  $F(2,82)=0.002$ ,  $p=0.998$ ). h-j) Survival probability as a function of the number of lesions detectable at necropsy within each of the DAI groups, a phenomenon that was recapitulated within each of the three strains (C57BL/6J:  $\chi^2=65.71$ ,  $p<0.0001$ ; CD1:  $\chi^2=35.05$ ,  $p<0.0001$ ; Sv129Ev:  $\chi^2=30.00$ ,  $p<0.0001$ ). In figures g through j,  $p<0.05$  are noted in red,  $p$  value  $> 0.1$  is noted in black.

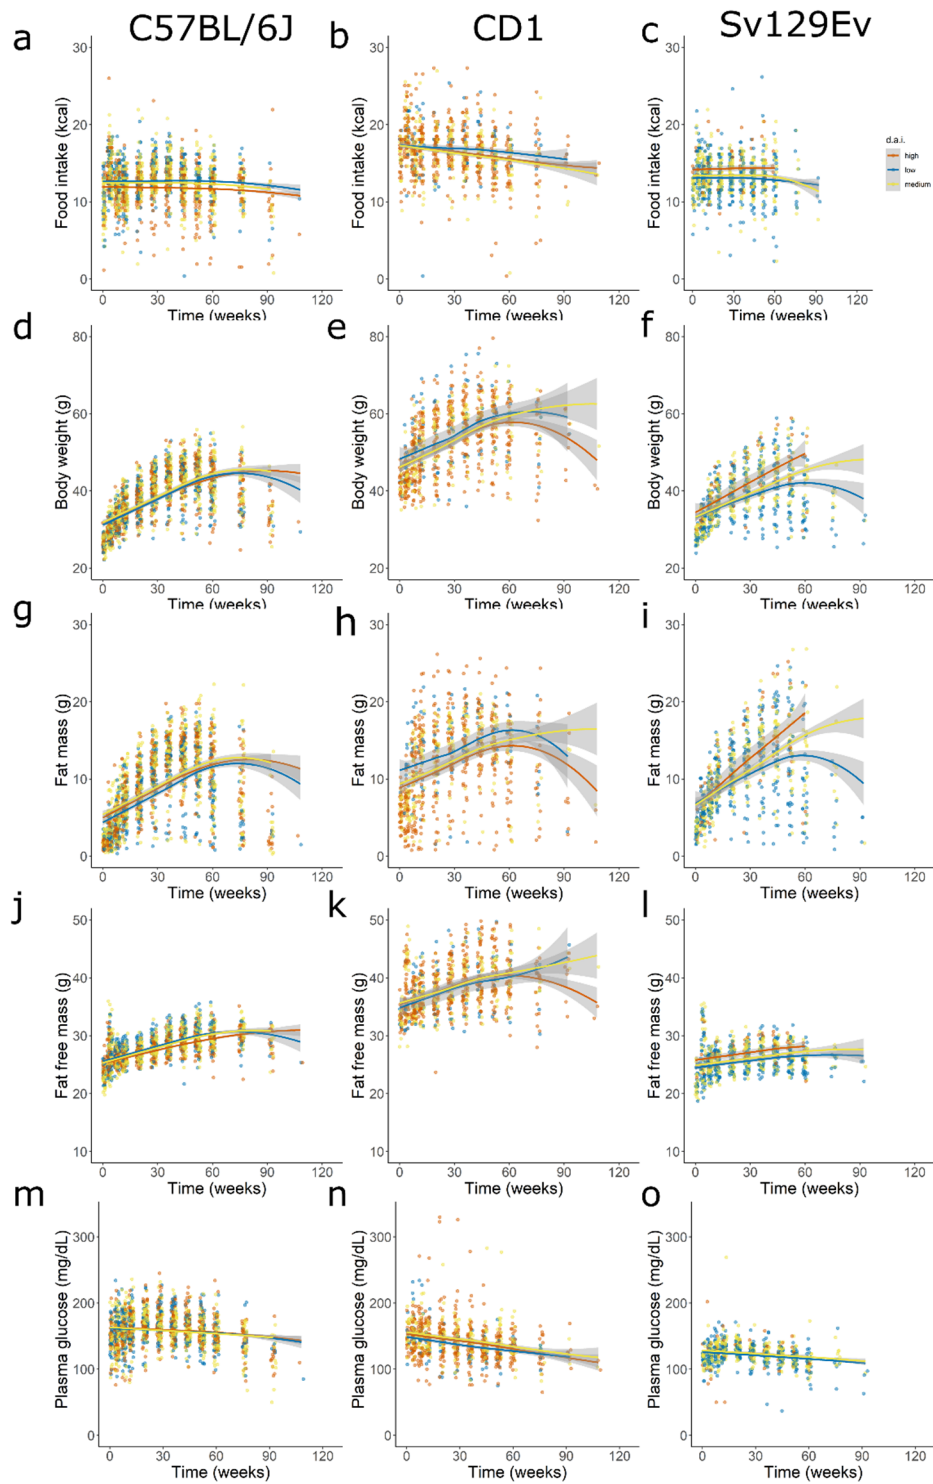

**Figure S4.** Healthspan profiling depending on DAI within each strain, as illustrated by individual values as well as linear mixed model predictors (solid lines) for the entire duration of the study, and including food intake (a-c), body weight (d-f), fat mass (g-i), fat free mass (j-l), plasma glucose (m-o).

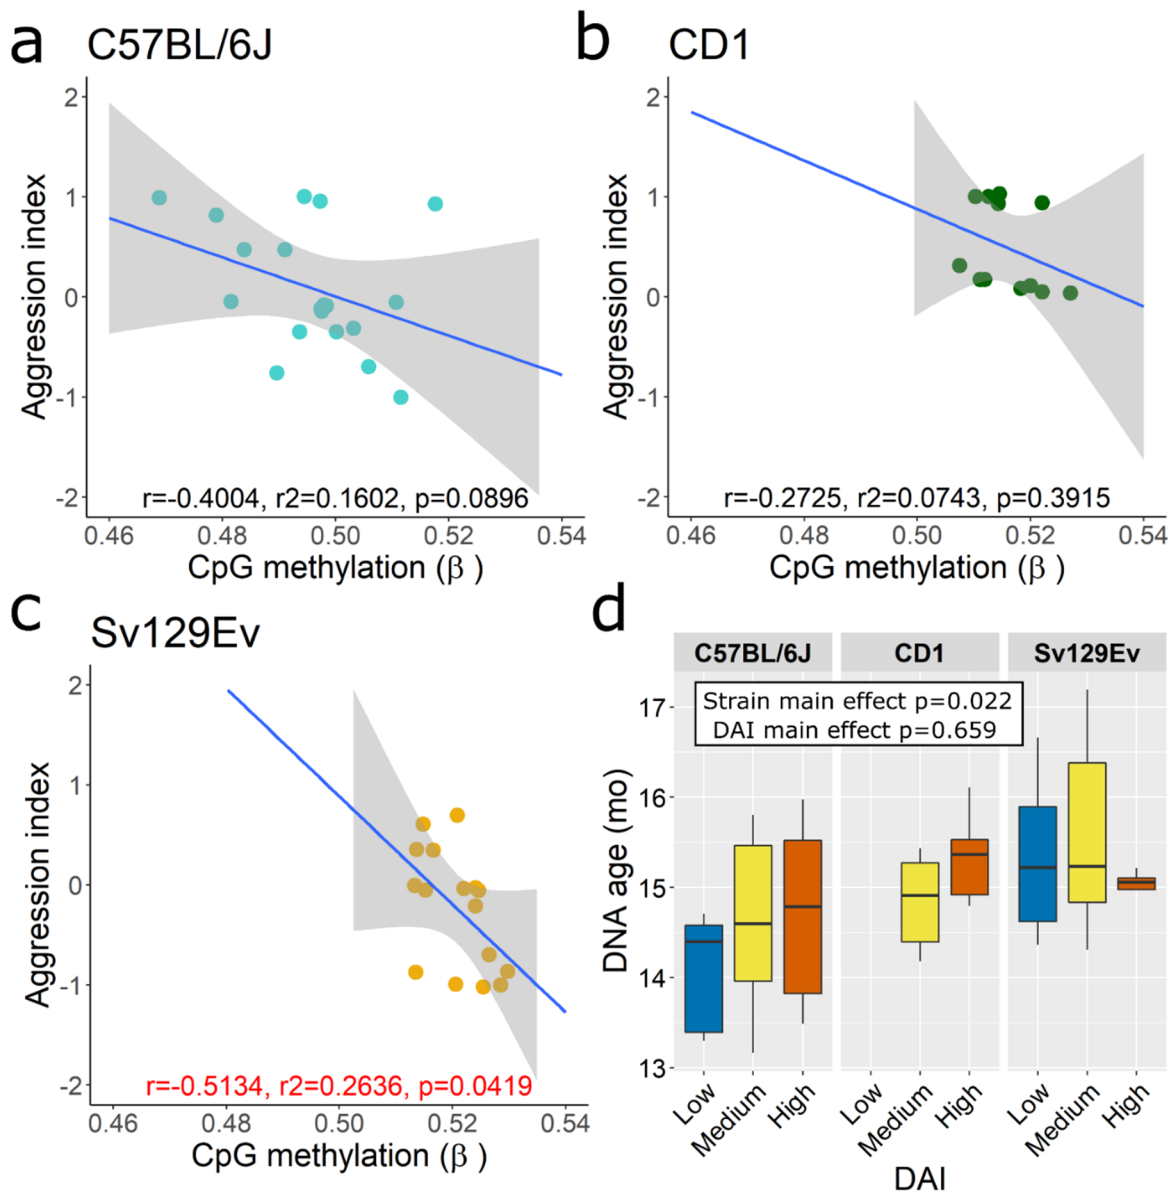

**Figure S5.** a-c) Scatterplots of the correlation between global CpG methylation level ( $\beta$ ) and aggression index in the C57BL/6J (a), CD1 (b), and Sv129Ev (c) strain. In figures a through c,  $p < 0.05$  are noted in red. d) Tukey box-and-whisker plot of the average epigenetic age (in months) by strain and DAI (strain:  $\eta_p^2 = 0.173$ , obs. power=0.705; DAI:  $\eta_p^2 = 0.021$ , obs. power=0.113). Box plot shows median, upper and lower quartiles, minimum and maximum values. Data from 2 animals that exceeded 2 standard deviations from the average were excluded from the analysis.



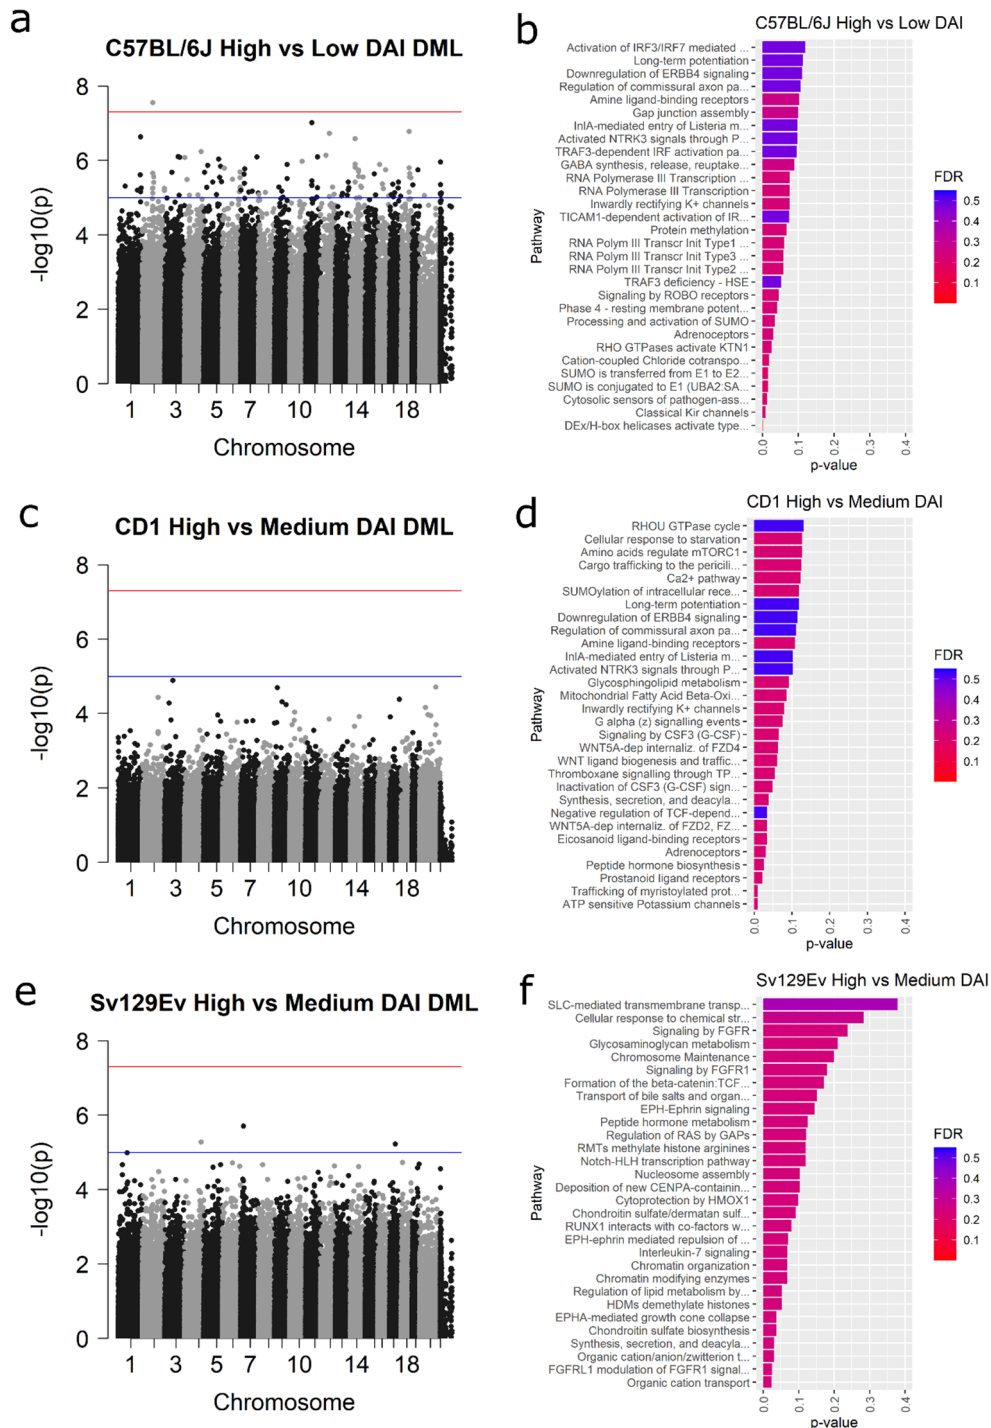

**Figure S6.** a,c,e) Features of differentially methylated CpG loci (DML). Each point in the Manhattan plots represents the location of a CpG locus (x-axis: autosomal chromosomes 1-19, chromosome X as 20 and chromosome Y as 21), and the association  $-\log_{10}p$  (y-axis) for the effect of DAI within each of the three strains (a) C57BL/6J, (b) CD1, and (c) Sv129Ev. The genome-wide significant threshold is set at  $-\log_{10}(5e-08)$  (red line) and the suggestive line threshold at  $-\log_{10}(1e-05)$  (blue line). b,d,f) Reactome gene pathways identified for each strain following the mapping of strain specific DMRs on the mouse genome. Reactome pathway browser version 3.7, database release 79; species *Mus musculus* pathways without projection to humans and with possible interactors (2).

| <i>Outcome</i>                | <i>Predictor</i> | <i>Estimate</i> | <i>Std. Error</i> | <i>t-value</i> | <i>p-value</i> | <i>Conditional R<sup>2</sup></i> | <i>Marginal R<sup>2</sup></i> | <i>Obs. power</i> |
|-------------------------------|------------------|-----------------|-------------------|----------------|----------------|----------------------------------|-------------------------------|-------------------|
| <i>Food intake (kcal)</i>     | (Intercept)      | 12.49           | 0.12              | 106.30         | <0.001         | 0.841                            | 0.073                         | 0.688             |
|                               | Time (weeks)     | -0.01           | 0.00              | -2.50          | 0.013          |                                  |                               |                   |
|                               | CD1              | 4.41            | 0.18              | 25.20          | <0.001         |                                  |                               |                   |
|                               | Sv129Ev          | 0.98            | 0.18              | 5.60           | <0.001         |                                  |                               |                   |
| <i>Body weight (g)</i>        | (Intercept)      | 31.49           | 0.26              | 120.50         | <0.001         | 0.925                            | 0.999                         | 1.0               |
|                               | Time (weeks)     | 0.22            | 0.01              | 29.70          | <0.001         |                                  |                               |                   |
|                               | CD1              | 14.90           | 0.45              | 33.20          | <0.001         |                                  |                               |                   |
|                               | Sv129Ev          | 1.71            | 0.45              | 3.80           | <0.001         |                                  |                               |                   |
| <i>Fat mass (g)</i>           | (Intercept)      | 4.87            | 0.19              | 26.30          | <0.001         | 0.921                            | 0.068                         | 1.0               |
|                               | Time (weeks)     | 0.12            | 0.01              | 22.40          | <0.001         |                                  |                               |                   |
|                               | CD1              | 4.25            | 0.31              | 13.90          | <0.001         |                                  |                               |                   |
|                               | Sv129Ev          | 2.05            | 0.31              | 6.70           | <0.001         |                                  |                               |                   |
| <i>Fat free mass (g)</i>      | (Intercept)      | 25.39           | 0.14              | 178.10         | <0.001         | 0.966                            | 0.227                         | 1.0               |
|                               | Time (weeks)     | 0.08            | 0.00              | 24.00          | <0.001         |                                  |                               |                   |
|                               | CD1              | 10.14           | 0.23              | 44.50          | <0.001         |                                  |                               |                   |
|                               | Sv129Ev          | -0.91           | 0.23              | -4.00          | <0.001         |                                  |                               |                   |
| <i>Plasma glucose (mg/dL)</i> | (Intercept)      | 164.51          | 1.17              | 141.00         | <0.001         | 0.515                            | 0.233                         | 1.0               |
|                               | Time (weeks)     | -0.21           | 0.02              | -9.60          | <0.001         |                                  |                               |                   |
|                               | CD1              | -15.86          | 1.59              | -10.0          | <0.001         |                                  |                               |                   |
|                               | Sv129Ev          | -36.47          | 1.60              | -22.80         | <0.001         |                                  |                               |                   |

**Table S1.** Results of linear mixed models for each of the predicted healthspan variables (food intake, body weight, fat mass, fat free mass, and plasma glucose) with time and strain as the fixed effects, time and subject nested within pair as random effects, and with an autocorrelation correction for repeated individual sampling. C57BL/6J is the reference group. All the models were defined as it follows: mod =lme(dep.var ~ time.var + cat.var1, random = ~ time.var|pair/ID, corr=corAR1(form = ~ weeks1 |pair/ ID), control=lmeControl(opt='optim'), data=data). In separate and dedicated models food intake, body weight, fat mass, fat free mass, plasma glucose served as dependent variable, time and strain as fixed factors, time and subject nested in pair as random factors.

| Lesion           | Strain   |       |         | $\chi^2$<br>(df=2) | p      | d     | Obs.<br>power |
|------------------|----------|-------|---------|--------------------|--------|-------|---------------|
|                  | C57BL/6J | CD1   | Sv129Ev |                    |        |       |               |
| Urinary          | 6.40     | 8.14  | 4.60    | 0.98               | 0.611  | 0.107 | 0.411         |
| Thymic           | 2.91     | 8.14  | 0.00    | 9.24               | 0.010  | 0.332 | 0.999         |
| Sternal          | 1.74     | 3.49  | 1.15    | 1.52               | 0.500  | 0.133 | 0.592         |
| Splenic          | 22.09    | 34.88 | 12.64   | 14.06              | 0.005  | 0.413 | 1.000         |
| Renal            | 18.60    | 19.77 | 13.79   | 1.15               | 0.562  | 0.116 | 0.473         |
| Pulmonary        | 24.42    | 38.37 | 21.84   | 5.61               | 0.061  | 0.257 | 0.993         |
| Pancreatic       | 5.23     | 2.33  | 2.30    | 1.73               | 0.421  | 0.142 | 0.652         |
| Ocular           | 11.05    | 8.14  | 0.00    | 10.25              | 0.006  | 0.350 | 0.999         |
| Mesenteric       | 1.74     | 9.30  | 4.60    | 5.59               | 0.612  | 0.257 | 0.993         |
| Intengumental    | 6.40     | 11.63 | 4.60    | 3.54               | 0.171  | 0.204 | 0.934         |
| Hepatic          | 37.21    | 50.00 | 20.69   | 12.01              | 0.003* | 0.380 | 0.999         |
| Hemorrhagic      | 2.91     | 11.63 | 0.00    | 15.12              | <0.001 | 0.429 | 1.000         |
| Genital          | 61.05    | 36.05 | 5.75    | 44.74              | <0.001 | 0.773 | 1.000         |
| Gastrointestinal | 6.40     | 11.63 | 11.49   | 1.81               | 0.405  | 0.145 | 0.672         |
| Cardiac          | 13.37    | 16.28 | 5.75    | 5.01               | 0.082  | 0.243 | 0.987         |
| Biliary          | 2.91     | 13.95 | 12.64   | 7.41               | 0.025  | 0.297 | 0.999         |
| Adrenal          | 3.49     | 4.65  | 4.60    | 0.20               | 0.904  | 0.048 | 0.115         |

Cont'd

| Lesion        | C57BL/6J vs<br>CD1 |       |       |               | C57BL/6J vs<br>SV129Ev |         |       |               | CD1 vs<br>Sv129Ev  |        |       |               |
|---------------|--------------------|-------|-------|---------------|------------------------|---------|-------|---------------|--------------------|--------|-------|---------------|
|               | $\chi^2$<br>(df=1) | p<=   | d     | Obs.<br>power | $\chi^2$<br>(df=1)     | p<=     | d     | Obs.<br>power | $\chi^2$<br>(df=2) | p<=    | d     | Obs.<br>power |
| Urinary       | 0.21               | 0.647 | 0.057 | 0.150         | 0.29                   | 0.588   | 0.067 | 0.191         | 0.98               | 0.612  | 0.151 | 0.510         |
| Thymic        | 2.48               | 0.115 | 0.197 | 0.887         | 2.91                   | 0.089   | 0.214 | 0.932         | 9.24               | 0.010^ | 0.476 | 0.999         |
| Sternal       | 0.58               | 0.446 | 0.095 | 0.333         | 0.12                   | 0.727   | 0.043 | 0.107         | 1.39               | 0.499  | 0.180 | 0.658         |
| Splenic       | 2.87               | 0.090 | 0.212 | 0.927         | 2.57                   | 0.109   | 0.202 | 0.903         | 10.7               | 0.005  | 0.515 | 0.999         |
| Renal         | 0.04               | 0.851 | 0.025 | 0.069         | 0.71                   | 0.398   | 0.105 | 0.391         | 1.15               | 0.562  | 0.164 | 0.578         |
| Pulmonary     | 3.10               | 0.078 | 0.221 | 0.945         | 0.14                   | 0.705   | 0.047 | 0.118         | 5.61               | 0.061  | 0.367 | 0.998         |
| Pancreatic    | 1.12               | 0.290 | 0.132 | 0.565         | 1.14                   | 0.285   | 0.133 | 0.572         | 1.73               | 0.421  | 0.202 | 0.757         |
| Ocular        | 0.44               | 0.507 | 0.083 | 0.267         | 11.05                  | <0.001^ | 0.423 | 0.999         | 10.2               | 0.006^ | 0.502 | 0.999         |
| Mesenteric    | 5.17               | 0.023 | 0.286 | 0.996         | 1.28                   | 0.257   | 0.141 | 0.621         | 5.59               | 0.061  | 0.367 | 0.998         |
| Intengumental | 1.52               | 0.218 | 0.154 | 0.698         | 0.29                   | 0.588   | 0.067 | 0.190         | 3.54               | 0.171  | 0.289 | 0.967         |
| Hepatic       | 1.88               | 0.171 | 0.171 | 0.786         | 4.71                   | 0.030   | 0.273 | 0.992         | 12.0               | 0.002^ | 0.548 | 0.999         |

|                  |      |       |       |       |       |         |       |       |      |        |       |       |
|------------------|------|-------|-------|-------|-------|---------|-------|-------|------|--------|-------|-------|
| Hemorrhagic      | 5.23 | 0.022 | 0.288 | 0.996 | 2.91  | 0.088   | 0.214 | 0.931 | 15.1 | <0.001 | 0.620 | 1.000 |
| Genital          | 6.44 | 0.011 | 0.320 | 0.999 | 45.78 | <0.001^ | 0.929 | 1.000 | 44.7 | <0.001 | 1.185 | 1.000 |
| Gastrointestinal | 1.52 | 0.218 | 0.154 | 0.698 | 1.45  | 0.228   | 0.150 | 0.675 | 1.81 | 0.405  | 0.206 | 0.773 |
| Cardiac          | 0.29 | 0.593 | 0.067 | 0.190 | 3.04  | 0.081   | 0.218 | 0.939 | 5.01 | 0.081  | 0.346 | 0.995 |
| Biliary          | 7.24 | 0.007 | 0.340 | 0.999 | 6.10  | 0.014   | 0.311 | 0.999 | 7.41 | 0.025  | 0.424 | 0.999 |
| Adrenal          | 0.17 | 0.684 | 0.051 | 0.130 | 0.15  | 0.697   | 0.048 | 0.121 | 0.20 | 0.904  | 0.068 | 0.145 |

**Table S2.** Percentage of mouse population presenting lesions detectable at necropsy. \* Denotes significant differences after Bonferroni adjustment for multiple comparisons across the 17 tests ( $\alpha=0.05/17$  tests = 0.003). ^ Denotes significant differences after Bonferroni's adjustment for multiple comparisons between the indicated strains ( $\alpha=0.05/3$  pairwise comparisons = 0.017). Effect size d computed as standardized mean difference.

### A. LDA Confusion matrix and statistics for genetic background

|                                      |          | Observed                |         |         |
|--------------------------------------|----------|-------------------------|---------|---------|
|                                      |          | C57BL/6J                | CD1     | Sv129Ev |
| Predicted                            | C57BL/6J | 32                      | 0       | 3       |
|                                      | CD1      | 0                       | 16      | 0       |
|                                      | Sv129Ev  | 1                       | 0       | 14      |
| <b>Overall Statistics</b>            |          |                         |         |         |
| Accuracy (95% CI)                    |          | 0.9394 (0.852 - 0.9832) |         |         |
| No Information Rate                  |          | 0.5                     |         |         |
| P-Value [Acc>NIR]                    |          | 1.042e-14               |         |         |
| Kappa                                |          | 0.9019                  |         |         |
| <b>ROC curve variable importance</b> |          |                         |         |         |
| Variable                             | C57BL/6J | CD1                     | Sv129Ev |         |
| Baseline Fat Free Mass (g)           | 100.00   | 100.00                  | 100.00  |         |
| Baseline Body Weight (g)             | 100.00   | 100.00                  | 100.00  |         |
| Baseline Fat Mass (g)                | 95.80    | 95.80                   | 70.14   |         |
| Baseline Food Intake (g)             | 84.13    | 84.13                   | 67.20   |         |
| Baseline Plasma Glucose (mg/dL)      | 71.91    | 81.82                   | 81.82   |         |
| Aggression Index                     | 12.47    | 50.03                   | 50.03   |         |
| Lesions at death (count)             | 25.21    | 17.23                   | 25.21   |         |
| Age at death (mo)                    | 17.77    | 0.00                    | 17.77   |         |

### B. LDA Confusion matrix and statistics for DAI category

|                                      |        | Observed                 |        |      |
|--------------------------------------|--------|--------------------------|--------|------|
|                                      |        | Low                      | Medium | High |
| Predicted                            | Low    | 17                       | 5      | 3    |
|                                      | Medium | 3                        | 15     | 0    |
|                                      | High   | 2                        | 2      | 14   |
| <b>Overall Statistics</b>            |        |                          |        |      |
| Accuracy (95% CI)                    |        | 0.5909 (0.4629 - 0.7105) |        |      |
| No Information Rate                  |        | 0.3333                   |        |      |
| P-Value [Acc>NIR]                    |        | 1.584e-5                 |        |      |
| Kappa                                |        | 0.3864                   |        |      |
| <b>ROC curve variable importance</b> |        |                          |        |      |
| Variable                             | Low    | Medium                   | High   |      |
| Baseline Fat Free Mass (g)           | 100.00 | 85.354                   | 100.00 |      |
| Baseline Body Weight (g)             | 62.96  | 51.442                   | 62.96  |      |
| Baseline Plasma Glucose (mg/dL)      | 61.49  | 40.604                   | 61.49  |      |
| Lesions at death (count)             | 43.89  | 25.739                   | 43.89  |      |
| Age at death (mo)                    | 35.87  | 12.994                   | 35.87  |      |
| Baseline Food Intake (g)             | 30.91  | 28.420                   | 30.91  |      |
| Baseline Fat Mass (g)                | 0.00   | 9.929                    | 0.00   |      |

**Table S3.** Linear Discriminant analysis (LDA) of the importance of the healthspan, aggression index, lesions and age at death importance as predictors to classify mice genetic background (A) or DAI category (B). For DAI classification, aggression index was omitted from the model. CI = confidence interval; Acc = accuracy; NIR = No Information Rate.

| Outcome                   | Strain   | Predictor    | Estimate | Std. Error | t-value | p-value | Conditional R <sup>2</sup> | Marginal R <sup>2</sup> | Obs. power |  |
|---------------------------|----------|--------------|----------|------------|---------|---------|----------------------------|-------------------------|------------|--|
| <i>Food intake (kcal)</i> | C57BL/6J | (Intercept)  | 11.90    | 0.18       | 68.23   | <0.001  | 0.850                      | 0.002                   | 0.097      |  |
|                           |          | Time (weeks) | -0.00    | 0.00       | -0.22   | 0.828   |                            |                         |            |  |
|                           |          | DAI          | medium   | 0.56       | 0.21    | 2.66    | 0.009                      |                         |            |  |
|                           |          |              | low      | 0.80       | 0.22    | 3.70    | <0.001                     |                         |            |  |
|                           | CD1      | (Intercept)  | 17.35    | 0.26       | 67.25   | <0.001  | 0.863                      | 0.006                   | 0.967      |  |
|                           |          | Time (weeks) | -0.03    | 0.01       | -4.65   | <0.001  |                            |                         |            |  |
|                           |          | DAI          | medium   | -0.11      | 0.40    | -0.27   | 0.790                      |                         |            |  |
|                           |          |              | low      | 0.10       | 0.52    | 0.19    | 0.849                      |                         |            |  |
|                           | Sv129Ev  | (Intercept)  | 14.23    | 0.45       | 31.92   | <0.001  | 0.882                      | 0.002                   | 0.065      |  |
|                           |          | Time (weeks) | 0.00     | 0.01       | 0.17    | 0.908   |                            |                         |            |  |
|                           |          | DAI          | medium   | -0.86      | 0.49    | -1.77   | 0.081                      |                         |            |  |
|                           |          |              | low      | -1.14      | 0.47    | -2.41   | 0.018                      |                         |            |  |
| <i>Body weight (g)</i>    | C57BL/6J | (Intercept)  | 31.55    | 0.35       | 90.84   | <0.001  | 0.915                      | 0.113                   | 1.0        |  |
|                           |          | Time (weeks) | 0.22     | 0.01       | 25.21   | <0.001  |                            |                         |            |  |
|                           |          | DAI          | medium   | 0.27       | 0.48    | 0.56    | 0.574                      |                         |            |  |
|                           |          |              | low      | -0.35      | 0.49    | -0.72   | 0.474                      |                         |            |  |
|                           | CD1      | (Intercept)  | 45.92    | 0.67       | 68.23   | <0.001  | 0.928                      | 0.090                   | 0.942      |  |
|                           |          | Time (weeks) | 0.23     | 0.02       | 13.80   | <0.001  |                            |                         |            |  |
|                           |          | DAI          | medium   | 0.19       | 1.18    | 0.16    | 0.873                      |                         |            |  |
|                           |          |              | low      | 2.50       | 1.53    | 1.64    | 0.106                      |                         |            |  |
|                           | Sv129Ev  | (Intercept)  | 34.20    | 1.05       | 32.67   | <0.001  | 0.917                      | 0.077                   | 1.0        |  |
|                           |          | Time (weeks) | 0.21     | 0.02       | 13.02   | <0.001  |                            |                         |            |  |
|                           |          | DAI          | medium   | -1.02      | 1.17    | -0.87   | 0.387                      |                         |            |  |
|                           |          |              | low      | -1.05      | 1.15    | -0.91   | 0.363                      |                         |            |  |
| <i>Fat mass (g)</i>       | C57BL/6J | (Intercept)  | 4.89     | 0.26       | 19.18   | <0.001  | 0.914                      | 0.057                   | 1.0        |  |
|                           |          | Time (weeks) | 0.12     | 0.01       | 19.43   | <0.001  |                            |                         |            |  |
|                           |          | DAI          | medium   | 0.50       | 0.35    | 1.42    | 0.158                      |                         |            |  |
|                           |          |              | low      | -0.51      | 0.36    | -1.42   | 0.157                      |                         |            |  |

|                               |          |              |        |        |      |         |         |       |       |       |
|-------------------------------|----------|--------------|--------|--------|------|---------|---------|-------|-------|-------|
|                               | CD1      | (Intercept)  |        | 8.85   | 0.48 | 18.614  | <0.001  | 0.921 | 0.037 | 0.717 |
|                               |          | Time (weeks) |        | 0.10   | 0.01 | 9.910   | <0.001  |       |       |       |
|                               |          | DAI          | medium | 0.49   | 0.81 | 0.602   | 0.549   |       |       |       |
|                               |          |              | low    | 2.22   | 1.05 | 2.104   | 0.038   |       |       |       |
|                               | Sv129Ev  | (Intercept)  |        | 6.70   | 0.65 | 10.244  | <0.001  | 0.935 | 0.053 | 1.0   |
|                               |          | Time (weeks) |        | 0.15   | 0.01 | 11.502  | <0.001  |       |       |       |
|                               |          | DAI          | medium | -0.06  | 0.73 | -0.084  | 0.933   |       |       |       |
|                               |          |              | low    | 0.15   | 0.71 | 0.206   | 0.838   |       |       |       |
| <i>Fat free mass (g)</i>      | C57BL/6J | (Intercept)  |        | 25.15  | 0.19 | 135.512 | <0.001  | 0.970 | 0.054 | 0.998 |
|                               |          | Time (weeks) |        | 0.08   | 0.00 | 26.422  | <0.001  |       |       |       |
|                               |          | DAI          | medium | 0.23   | 0.25 | 0.928   | 0.355   |       |       |       |
|                               |          |              | low    | 0.46   | 0.25 | 1.824   | 0.070   |       |       |       |
|                               | CD1      | (Intercept)  |        | 35.39  | 0.34 | 105.525 | <0.0001 | 0.960 | 0.035 | 0.958 |
|                               |          | Time (weeks) |        | 0.10   | 0.01 | 10.853  | <0.001  |       |       |       |
|                               |          | DAI          | medium | 0.29   | 0.59 | 0.499   | 0.6187  |       |       |       |
|                               |          |              | low    | -0.57  | 0.76 | -0.744  | 0.459   |       |       |       |
|                               | Sv129Ev  | (Intercept)  |        | 25.86  | 0.62 | 41.66   | <0.001  | 0.888 | 0.025 | 0.928 |
|                               |          | Time (weeks) |        | 0.04   | 0.00 | 9.57    | <0.001  |       |       |       |
|                               |          | DAI          | medium | -1.00  | 0.69 | -1.46   | 0.149   |       |       |       |
|                               |          |              | low    | -1.39  | 0.67 | -2.07   | 0.042   |       |       |       |
| <i>Plasma glucose (mg/dL)</i> | C57BL/6J | (Intercept)  |        | 163.53 | 1.86 | 86.28   | <0.001  | 0.427 | 0.011 | 0.989 |
|                               |          | Time (weeks) |        | -0.13  | 0.03 | -4.18   | <0.001  |       |       |       |
|                               |          | DAI          | medium | -1.87  | 2.13 | -0.88   | 0.381   |       |       |       |
|                               |          |              | low    | -1.19  | 2.20 | -0.54   | 0.590   |       |       |       |
|                               | CD1      | (Intercept)  |        | 153.35 | 2.56 | 59.91   | <0.001  | 0.333 | 0.085 | 1.0   |
|                               |          | Time (weeks) |        | -0.37  | 0.04 | -9.11   | <0.001  |       |       |       |
|                               |          | DAI          | medium | 2.74   | 4.11 | 0.67    | 0.506   |       |       |       |
|                               |          |              | low    | -4.82  | 5.35 | -0.90   | 0.370   |       |       |       |
|                               | Sv129Ev  | (Intercept)  |        | 126.72 | 2.62 | 48.40   | <0.001  | 0.429 | 0.031 | 0.998 |

|  |     |              |       |      |       |        |  |  |  |
|--|-----|--------------|-------|------|-------|--------|--|--|--|
|  |     | Time (weeks) | -0.17 | 0.03 | -5.30 | <0.001 |  |  |  |
|  | DAI | medium       | 1.79  | 2.81 | 0.64  | 0.527  |  |  |  |
|  |     | low          | -0.83 | 2.75 | -0.30 | 0763   |  |  |  |

**Table S4.** Linear mixed model analysis of healthspan variables for each of the 3 strains, with DAI and time as fixed factors, time and ID nested within pair as random factors, and with an autocorrelation correction for repeated individual sampling. High DAI is the reference group. All the models were defined as it follows: `mod =lme(dep.var ~ time.var + cat.var1, random = ~ time.var|pair/ID, corr=corAR1(form = ~ weeks1 |pair/ID), control=lmeControl(opt='optim'), data=data)`. In separate and dedicated models for each strain food intake, body weight, fat mass, fat free mass, plasma glucose served as dependent variable, time and DAI as fixed factors, time and subject as random factors.



A.

| DAI    | Survival        | Strain   |     |         | K-W<br>(df=2) | p<=    | $\eta^2$ [H] | C57BL/6J vs CD1 |       |       | C57BL/6J vs Sv129Ev |        |       | CD1 vs Sv129Ev |       |       |
|--------|-----------------|----------|-----|---------|---------------|--------|--------------|-----------------|-------|-------|---------------------|--------|-------|----------------|-------|-------|
|        |                 | C57BL/6J | CD1 | Sv129Ev |               |        |              | W<br>(df=1)     | p<=   | r     | W<br>(df=1)         | p<=    | r     | W<br>(df=1)    | p<=   | r     |
| Low    | 50%<br>(23.8mo) | 51%      | 58% | 42%     | 2.27          | 0.321  | 0.002        | 298             | 0.466 | 0.089 | 1424.5              | 0.301  | 0.103 | 336            | 0.162 | 0.187 |
|        | 10%<br>(29.6mo) | 12%      | 8%  | 9%      | 0.36          | 0.835  | <0           | 355             | 0.722 | 0.045 | 1326                | 0.590  | 0.054 | 270.5          | 1     | 0.003 |
| Medium | 50%<br>(24.3mo) | 61%      | 46% | 33%     | 9.68          | 0.008* | 0.069        | 839             | 0.096 | 0.186 | 1277                | 0.003* | 0.316 | 448            | 0.342 | 0.127 |
|        | 10%<br>(30.7mo) | 16%      | 8%  | 3%      | 3.93          | 0.140  | 0.017        | 734             | 0.390 | 0.096 | 1065                | 0.057  | 0.201 | 418            | 0.369 | 0.122 |
| High   | 50%<br>(25.5mo) | 58%      | 46% | 22%     | 6.20          | 0.045* | 0.037        | 1619.5          | 0.200 | 0.136 | 376.5               | 0.018* | 0.295 | 297            | 0.094 | 0.211 |
|        | 10%<br>(31.8mo) | 14%      | 8%  | 0%      | 1.92          | 0.384  | <0           | 1500            | 0.396 | 0.079 | 292.5               | 0.242  | 0.144 | 243            | 0.397 | 0.113 |

B.

| Strain   | Survival        | DAI |     |      | K-W<br>(df=2) | p<=    | $\eta^2$ [H] | Low vs Medium |        |       | Low vs High |        |       | Medium vs High |       |       |
|----------|-----------------|-----|-----|------|---------------|--------|--------------|---------------|--------|-------|-------------|--------|-------|----------------|-------|-------|
|          |                 | Low | Med | High |               |        |              | W<br>(df=1)   | p<=    | r     | W<br>(df=1) | p<=    | r     | W<br>(df=1)    | p<=   | r     |
| C57BL/6J | 50%<br>(25.7mo) | 39% | 56% | 54%  | 6.06          | 0.048* | 0.02         | 1976          | 0.031* | 0.202 | 1974        | 0.032* | 0.206 | 1597.5         | 0.875 | 0.018 |
|          | 10%<br>(31.8mo) | 5%  | 7%  | 14%  | 2.85          | 0.240  | 0.005        | 1651          | 0.723  | 0.07  | 1761        | 0.132  | 0.179 | 1512           | 0.233 | 0.123 |
| CD1      | 50%<br>(24.8mo) | 50% | 42% | 52%  | 0.99          | 0.611  | <0           | 1240          | 0.472  | 0.123 | 300         | 1      | 0     | 524            | 0.348 | 0.110 |

|                |                        |     |     |     |      |       |    |       |       |       |     |       |       |       |       |       |
|----------------|------------------------|-----|-----|-----|------|-------|----|-------|-------|-------|-----|-------|-------|-------|-------|-------|
|                | <b>10%</b><br>(31.3mo) | 8%  | 8%  | 12% | 0.31 | 0.855 | <0 | 144   | 1     | 0     | 312 | 0.709 | 0.05  | 578   | 0.645 | 0.06  |
| <b>Sv129Ev</b> | <b>50%</b><br>(22.2mo) | 56% | 45% | 33% | 1.56 | 0.458 | <0 | 687.5 | 0.495 | 0.08  | 155 | 0.247 | 0.159 | 170.5 | 0.465 | 0.115 |
|                | <b>10%</b><br>(27.7mo) | 11% | 12% | 0%  | 1.14 | 0.564 | <0 | 745   | 0.971 | 0.005 | 180 | 0.310 | 0.141 | 165   | 0.292 | 0.167 |

**Table S5.** Percent survival at median and maximum (10%) survival as a function of the strain and discretized aggression index (DAI).

Data were analyzed as counts (percentages) surviving using the Gao-Allison methods for testing differences in maximum lifespan (3) with tau for median (50%) and maximum (top 10%) survival calculated (A) per DAI group, and (B) per strain ; K-W, Kruskal-Wallis test; W, Wilcoxon rank sum test. \* p<0.05.

| <b>Strain</b> | <b>DAI</b> | <b>HR</b> | <b>95% CI</b> | <b>p-value</b> |
|---------------|------------|-----------|---------------|----------------|
| C57BL/6J      | low        | 1.51      | 0.99-2.31     | 0.031          |
|               | high       | 0.87      | 0.57-1.32     |                |
| CD1           | low        | 0.98      | 0.48-1.99     | 0.853          |
|               | high       | 0.88      | 0.53-1.45     |                |
| Sv129Ev       | low        | 0.85      | 0.54-1.35     | 0.513          |
|               | high       | 1.28      | 0.61-2.71     |                |

**Table S6.** Cox regression time to death analysis hazard ratios (HR) and confidence interval (CI) with the medium DAI group as reference for each of the strains. The model was adjusted for pair as random factor.

| Order | cpg        | Chr | Position | Gene ID  | C57BL/6J |                       | Direction of association with ref group |
|-------|------------|-----|----------|----------|----------|-----------------------|-----------------------------------------|
|       |            |     |          |          | p-value  | Level of significance |                                         |
| 1     | cg38646594 | 2   | 86669066 | NA       | 2.80E-08 | significant           | +                                       |
| 2     | cg29535263 | 11  | 52447690 | NA       | 9.69E-08 | suggestive            | +                                       |
| 3     | cg35850660 | 18  | 66431979 | NA       | 1.66E-07 | suggestive            | +                                       |
| 4     | cg30799690 | 12  | 74075255 | Syt16    | 1.87E-07 | suggestive            | +                                       |
| 5     | cg37865611 | 1   | 1.82E+08 | Enah     | 2.31E-07 | suggestive            | +                                       |
| 6     | cg32412206 | 14  | 43787293 | Gm5799   | 2.58E-07 | suggestive            | +                                       |
| 7     | cg41542652 | 4   | 1.36E+08 | Lypla2   | 5.77E-07 | suggestive            | -                                       |
| 8     | cg30595132 | 12  | 44391610 | Nrcam    | 7.19E-07 | suggestive            | +                                       |
| 9     | cg40183908 | 3   | 1.1E+08  | Ntng1    | 7.86E-07 | suggestive            | +                                       |
| 10    | cg45178315 | 7   | 1.32E+08 | Fgfr2    | 7.95E-07 | suggestive            | +                                       |
| 11    | cg29993401 | 11  | 97329068 | Arhgap23 | 8.00E-07 | suggestive            | +                                       |
| 12    | cg40271573 | 3   | 1.23E+08 | Sec24    | 8.20E-07 | suggestive            | +                                       |
| 13    | cg40569998 | 4   | 5264455  | NA       | 8.39E-07 | suggestive            | +                                       |
| 14    | cg42744710 | 5   | 1.22E+08 | NA       | 9.13E-07 | suggestive            | +                                       |
| 15    | cg28919112 | 10  | 1.01E+08 | NA       | 1.05E-06 | suggestive            | +                                       |
| 16    | cg48218845 | 21  | 2266017  | NA       | 1.10E-06 | suggestive            | +                                       |
| 17    | cg32414003 | 14  | 44116955 | NA       | 1.25E-06 | suggestive            | +                                       |
| 18    | cg33952050 | 16  | 17054469 | Hic2     | 1.27E-06 | suggestive            | +                                       |
| 19    | cg47188237 | 9   | 1.04E+08 | NA       | 1.27E-06 | suggestive            | +                                       |
| 20    | cg42016915 | 5   | 33953778 | NA       | 1.34E-06 | suggestive            | +                                       |
| 21    | cg42924664 | 5   | 1.38E+08 | NA       | 1.44E-06 | suggestive            | +                                       |
| 22    | cg32413404 | 14  | 43991839 | Gm6526   | 1.52E-06 | suggestive            | +                                       |
| 23    | cg35851396 | 18  | 66491663 | NA       | 1.58E-06 | suggestive            | +                                       |

|    |            |    |          |         |          |            |   |
|----|------------|----|----------|---------|----------|------------|---|
| 24 | cg43184802 | 6  | 18793842 | NA      | 1.60E-06 | suggestive | + |
| 25 | cg44434125 | 7  | 35537781 | Gm28514 | 1.68E-06 | suggestive | - |
| 26 | cg36482058 | 19 | 47934973 | Cfap58  | 1.76E-06 | suggestive | + |
| 27 | cg34315332 | 16 | 65523530 | NA      | 1.78E-06 | suggestive | + |
| 28 | cg32670645 | 14 | 73142593 | NA      | 1.81E-06 | suggestive | + |
| 29 | cg32670651 | 14 | 73142812 | NA      | 1.95E-06 | suggestive | + |
| 30 | cg44111625 | 6  | 1.42E+08 | NA      | 2.03E-06 | suggestive | + |

### CD1

| Order | cpg        | Chr | Position | Gene ID | p-value  | Level of significance | Direction of association with ref group |
|-------|------------|-----|----------|---------|----------|-----------------------|-----------------------------------------|
| 1     | cg39852628 | 3   | 67442076 | NA      | 1.29E-05 | not significant       | +                                       |
| 2     | cg48019901 | 20  | 1.34E+08 | Gm15015 | 1.95E-05 | not significant       | +                                       |
| 3     | cg46534633 | 9   | 26992086 | Ncapd3  | 2.00E-05 | not significant       | +                                       |
| 4     | cg38936095 | 2   | 1.28E+08 | Acox1   | 3.66E-05 | not significant       | +                                       |
| 5     | cg35248666 | 17  | 79852800 | NA      | 4.17E-05 | not significant       | +                                       |
| 6     | cg46870232 | 9   | 64390801 | Megf11  | 4.83E-05 | not significant       | +                                       |
| 7     | cg39658225 | 3   | 37497626 | Spata5  | 5.20E-05 | not significant       | +                                       |
| 8     | cg47107617 | 9   | 95482225 | NA      | 5.78E-05 | not significant       | +                                       |
| 9     | cg47633187 | 20  | 51963222 | NA      | 6.86E-05 | not significant       | +                                       |

|    |            |    |          |                                 |          |                 |   |
|----|------------|----|----------|---------------------------------|----------|-----------------|---|
| 10 | cg28394239 | 10 | 42018312 | NA                              | 9.18E-05 | not significant | - |
| 11 | cg47722149 | 20 | 70917118 | NA                              | 0.00011  | not significant | + |
| 12 | cg42638860 | 5  | 1.15E+08 | 1500011B03Rik;<br>2610524H06Rik | 0.00011  | not significant | + |
| 13 | cg47838301 | 20 | 94865798 | Zc3h1b                          | 0.00011  | not significant | - |
| 14 | cg32718185 | 14 | 78276445 | Gm48954                         | 0.00012  | not significant | + |
| 15 | cg34602611 | 17 | 7190076  | Rsph3b                          | 0.00012  | not significant | - |
| 16 | cg30756917 | 12 | 70074253 | Nin                             | 0.00014  | not significant | + |
| 17 | cg39739084 | 3  | 51484100 | NA                              | 0.00015  | not significant | - |
| 18 | cg28375764 | 10 | 40257654 | Cdk19                           | 0.00015  | not significant | - |
| 19 | cg44914594 | 7  | 1E+08    | Fam168a                         | 0.00015  | not significant | - |
| 20 | cg42901277 | 5  | 1.36E+08 | Orai2                           | 0.00016  | not significant | + |
| 21 | cg44543118 | 7  | 47008189 | NA                              | 0.00016  | not significant | - |
| 22 | cg43921097 | 6  | 1.2E+08  | Wnk1                            | 0.00017  | not significant | - |
| 23 | cg46479420 | 9  | 20460086 | NA                              | 0.00017  | not significant | - |
| 24 | cg46391587 | 9  | 4309388  | Aasdhppt                        | 0.00018  | not significant | - |
| 25 | cg28265553 | 10 | 22729317 | NA                              | 0.0002   | not significant | + |
| 26 | cg48036020 | 20 | 1.37E+08 | Illrap12                        | 0.0002   | not significant | + |

|    |            |    |          |       |         |                 |   |
|----|------------|----|----------|-------|---------|-----------------|---|
| 27 | cg32403405 | 14 | 41087832 | NA    | 0.00022 | not significant | + |
| 28 | cg28738156 | 10 | 81320308 | NA    | 0.00026 | not significant | - |
| 29 | cg29681398 | 11 | 67625172 | Glpr2 | 0.00028 | not significant | + |
| 30 | cg41409042 | 4  | 1.26E+08 | Grik3 | 0.00028 | not significant | + |

### Sv129Ev

| Order | cpg        | Chr | Position | Gene ID       | p-value  | Level of significance | Direction of association with ref group |
|-------|------------|-----|----------|---------------|----------|-----------------------|-----------------------------------------|
| 1     | cg44315949 | 7   | 24333976 | Gm26550       | 1.97E-06 | suggestive            | +                                       |
| 2     | cg41542652 | 4   | 1.36E+08 | Lypla2        | 5.27E-06 | suggestive            | +                                       |
| 3     | cg34962073 | 17  | 46253657 | NA            | 5.93E-06 | suggestive            | -                                       |
| 4     | cg37092343 | 1   | 74882495 | NA            | 1.02E-05 | not significant       | +                                       |
| 5     | cg35443870 | 18  | 12974748 | Osbp11a       | 1.88E-05 | not significant       | +                                       |
| 6     | cg43616393 | 6   | 82905144 | Sema4f        | 1.91E-05 | not significant       | +                                       |
| 7     | cg36571320 | 19  | 57702184 | Atrnl1        | 2.04E-05 | not significant       | +                                       |
| 8     | cg36810749 | 1   | 36782471 | 4933424G06Rik | 2.15E-05 | not significant       | +                                       |
| 9     | cg42910173 | 5   | 1.37E+08 | 4933404012Rik | 2.15E-05 | not significant       | -                                       |
| 10    | cg45580295 | 8   | 35825149 | NA            | 2.15E-05 | not significant       | +                                       |

|    |            |    |          |                            |          |                 |   |
|----|------------|----|----------|----------------------------|----------|-----------------|---|
| 11 | cg31162817 | 12 | 1.13E+08 | Adssl1                     | 2.30E-05 | not significant | + |
| 12 | cg44090234 | 6  | 1.4E+08  | Pik3c2g                    | 2.33E-05 | not significant | - |
| 13 | cg32669979 | 14 | 73061363 | Gm41206                    | 2.38E-05 | not significant | + |
| 14 | cg42329931 | 5  | 77266773 | Gm15831                    | 2.48E-05 | not significant | - |
| 15 | cg36440609 | 19 | 45006822 | Lzts2                      | 2.58E-05 | not significant | - |
| 16 | cg48214177 | 21 | 1146940  | Uty                        | 2.75E-05 | not significant | - |
| 17 | cg38995122 | 2  | 1.34E+08 | Tmx4                       | 3.25E-05 | not significant | - |
| 18 | cg30050277 | 11 | 1.01E+08 | Nbr1                       | 3.40E-05 | not significant | + |
| 19 | cg36810747 | 1  | 36782275 | 4933424G06Rik;<br>Gm335533 | 3.95E-05 | not significant | + |
| 20 | cg32045742 | 13 | 1.08E+08 | Ndufaf2                    | 4.24E-05 | not significant | + |
| 21 | cg30873316 | 12 | 82171778 | NA                         | 4.52E-05 | not significant | + |
| 22 | cg29084456 | 10 | 1.21E+08 | Gns                        | 4.84E-05 | not significant | + |
| 23 | cg28581892 | 10 | 67102119 | NA                         | 5.14E-05 | not significant | + |
| 24 | cg44299063 | 7  | 19950713 | NA                         | 5.22E-05 | not significant | + |
| 25 | cg30282584 | 11 | 1.2E+08  | NA                         | 5.25E-05 | not significant | + |
| 26 | cg45849815 | 8  | 75041924 | NA                         | 5.30E-05 | not significant | + |
| 27 | cg39997317 | 3  | 88685688 | 5830417110Rik              | 5.31E-05 | not significant | + |



|    |            |   |          |        |          |                 |   |
|----|------------|---|----------|--------|----------|-----------------|---|
| 28 | cg38600828 | 2 | 79161936 | Itga4  | 5.36E-05 | not significant | - |
| 29 | cg40638851 | 4 | 15268768 | Tmem64 | 5.70E-05 | not significant | - |
| 30 | cg37479939 | 1 | 1.33E+08 | Sox13  | 5.73E-05 | not significant | + |

**Table S7.** Top differentially methylated loci (DMLs) within each strain in comparisons between DAI groups. Significant = p values below the genome-wide significant threshold ( $p < 5e-08$ ); suggestive = p values between the genome-wide significant threshold and the suggestive threshold ( $5e-08 < p < 1e-05$ ); not significant = p values above the suggestive threshold ( $p > 1e-05$ ). Chr = chromosome; DML = differentially methylated locus.

C57BL/6J

| Order | Chr | Start    | Stop     | Probes<br>in DMR | p-value  | BH-<br>adjusted<br>pvalue | level of<br>significance | Gene name (UCSC)                          | Direction of<br>association<br>with ref<br>group |
|-------|-----|----------|----------|------------------|----------|---------------------------|--------------------------|-------------------------------------------|--------------------------------------------------|
| 1     | 12  | 1.1E+08  | 1.1E+08  | 21               | 4.91E-48 | 6.52E-43                  | significant              | no transcript                             | -                                                |
| 2     | 7   | 1.43E+08 | 1.43E+08 | 16               | 3.31E-15 | 2.2E-10                   | significant              | Mir675                                    | -                                                |
| 3     | 11  | 51436440 | 51437601 | 3                | 3.53E-14 | 1.56E-09                  | significant              | no transcript                             | +                                                |
| 4     | 1   | 40442427 | 40465902 | 8                | 1.61E-13 | 5.35E-09                  | significant              | Il18r1; Il1rl1                            | +                                                |
| 5     | 7   | 67803849 | 67804129 | 4                | 5.95E-13 | 1.16E-08                  | significant              | no transcript                             | -                                                |
| 6     | 3   | 81997016 | 81999791 | 4                | 4.98E-13 | 1.16E-08                  | significant              | Asic5                                     | -                                                |
| 7     | 18  | 66491595 | 66495636 | 4                | 6.13E-13 | 1.16E-08                  | significant              | no transcript                             | +                                                |
| 8     | 16  | 94066300 | 94066426 | 5                | 8.41E-13 | 1.4E-08                   | significant              | no transcript                             | -                                                |
| 9     | 9   | 45939275 | 45943660 | 8                | 9.78E-13 | 1.44E-08                  | significant              | Mir7087                                   | -                                                |
| 10    | 12  | 1.12E+08 | 1.12E+08 | 4                | 1.67E-12 | 2.22E-08                  | significant              | Klc1                                      | -                                                |
| 11    | 11  | 53772482 | 53784759 | 6                | 3.31E-12 | 3.99E-08                  | significant              | Irf1                                      | +                                                |
| 12    | 7   | 1.03E+08 | 1.03E+08 | 16               | 3.91E-12 | 3.99E-08                  | significant              | Olf859; Olf856; Olf855;<br>Olf854; Olf853 | +                                                |
| 13    | 4   | 1.27E+08 | 1.27E+08 | 5                | 3.88E-12 | 3.99E-08                  | significant              | Gjb3                                      | -                                                |
| 14    | 15  | 81925826 | 81926515 | 5                | 4.39E-12 | 4.16E-08                  | significant              | Polr3h                                    | -                                                |
| 15    | 14  | 70462819 | 70466883 | 4                | 5.38E-12 | 4.76E-08                  | significant              | Phyhip                                    | +                                                |
| 16    | 5   | 74702963 | 74703128 | 3                | 9.88E-12 | 8.2E-08                   | significant              | no transcript                             | -                                                |
| 17    | 2   | 90782626 | 90783534 | 6                | 1.74E-11 | 1.36E-07                  | significant              | Agbl2                                     | -                                                |
| 18    | 2   | 87739264 | 87769271 | 3                | 3.69E-11 | 2.45E-07                  | significant              | Olf1140; Olf1141                          | +                                                |
| 19    | 13  | 1.2E+08  | 1.2E+08  | 3                | 3.52E-11 | 2.45E-07                  | significant              | cDNA sequence BC147527                    | +                                                |
| 20    | 12  | 1.1E+08  | 1.1E+08  | 4                | 6.73E-11 | 4.25E-07                  | significant              | no transcript                             | -                                                |
| 21    | 15  | 80115299 | 80115989 | 4                | 8.64E-11 | 5.17E-07                  | significant              | Syngr1                                    | -                                                |

|           |    |          |          |   |          |          |             |               |   |
|-----------|----|----------|----------|---|----------|----------|-------------|---------------|---|
| <b>22</b> | 15 | 60164803 | 60297120 | 7 | 8.96E-11 | 5.17E-07 | significant | no transcript | + |
| <b>23</b> | 6  | 55676907 | 55677183 | 4 | 1.43E-10 | 7.91E-07 | significant | no transcript | - |
| <b>24</b> | 7  | 45822541 | 45827305 | 6 | 1.9E-10  | 9.42E-07 | significant | Grwd1; Kcnj14 | + |
| <b>25</b> | 19 | 44649530 | 44649889 | 4 | 1.92E-10 | 9.42E-07 | significant | no transcript | - |
| <b>26</b> | 8  | 27227730 | 27228676 | 5 | 2.47E-10 | 1.13E-06 | significant | Adrb3         | - |
| <b>27</b> | 7  | 16365024 | 16368610 | 3 | 2.82E-10 | 1.2E-06  | significant | Sae1          | - |
| <b>28</b> | 11 | 35505042 | 35544982 | 7 | 2.86E-10 | 1.2E-06  | significant | Slit3         | + |
| <b>29</b> | Y  | 2664232  | 2743793  | 9 | 3.25E-10 | 1.2E-06  | significant | H2a2b         | + |
| <b>30</b> | 5  | 97935268 | 97935581 | 3 | 3.45E-10 | 1.2E-06  | significant | no transcript | - |

### CD1

| Order     | Chr | Start    | Stop     | Probes in DMR | p-value  | BH-adjusted pvalue | level of significance | Gene name (UCSC) | Direction of association with ref group |
|-----------|-----|----------|----------|---------------|----------|--------------------|-----------------------|------------------|-----------------------------------------|
| <b>1</b>  | 9   | 1.04E+08 | 1.04E+08 | 7             | 2.87E-16 | 1.27E-11           | significant           | Uba5; Acad11     | -                                       |
| <b>2</b>  | 11  | 1.01E+08 | 1.01E+08 | 3             | 1.05E-15 | 3.5E-11            | significant           | no transcript    | +                                       |
| <b>3</b>  | 5   | 1.1E+08  | 1.1E+08  | 4             | 3.19E-12 | 8.46E-08           | significant           | Chfr             | -                                       |
| <b>4</b>  | 7   | 13261082 | 13261446 | 4             | 6.34E-12 | 1.2E-07            | significant           | Zswim9           | -                                       |
| <b>5</b>  | 6   | 56568439 | 56574052 | 6             | 2.1E-10  | 2.32E-06           | significant           | no transcript    | -                                       |
| <b>6</b>  | 7   | 19332833 | 19342527 | 3             | 3.71E-09 | 3.79E-05           | significant           | no transcript    | -                                       |
| <b>7</b>  | 8   | 27227730 | 27228676 | 5             | 5.15E-09 | 4.89E-05           | significant           | Adrb3            | +                                       |
| <b>8</b>  | 17  | 32891475 | 32891715 | 4             | 1.09E-08 | 9.35E-05           | significant           | Zfp870           | -                                       |
| <b>9</b>  | 3   | 96278226 | 96278548 | 3             | 1.24E-08 | 9.66E-05           | significant           | no transcript    | +                                       |
| <b>10</b> | 6   | 1.43E+08 | 1.43E+08 | 3             | 4.34E-08 | 0.000274           | significant           | Kcnj8            | +                                       |
| <b>11</b> | 10  | 81332257 | 81332762 | 4             | 7.93E-08 | 0.000458           | suggestive            | Tbxa2r           | -                                       |

|    |    |          |          |   |          |          |                 |               |   |
|----|----|----------|----------|---|----------|----------|-----------------|---------------|---|
| 12 | 6  | 1.28E+08 | 1.28E+08 | 5 | 9.8E-08  | 0.000542 | suggestive      | Itfg2         | - |
| 13 | 11 | 88293992 | 88297947 | 4 | 1.36E-07 | 0.000724 | suggestive      | Ccdc182       | - |
| 14 | 11 | 1.21E+08 | 1.21E+08 | 3 | 3.71E-07 | 0.001587 | suggestive      | Rab40B        | + |
| 15 | 10 | 80172911 | 80173108 | 3 | 5.64E-07 | 0.002122 | suggestive      | Fam174c       | - |
| 16 | 9  | 1.04E+08 | 1.04E+08 | 4 | 7.58E-07 | 0.00272  | suggestive      | Nphp3         | - |
| 17 | 12 | 1.19E+08 | 1.19E+08 | 3 | 1.04E-06 | 0.003543 | suggestive      | D230030E09Rik | - |
| 18 | 10 | 1.27E+08 | 1.27E+08 | 3 | 1.35E-06 | 0.004371 | suggestive      | B4galnt1      | - |
| 19 | 4  | 1.48E+08 | 1.48E+08 | 5 | 2.08E-06 | 0.006268 | suggestive      | Fv1; Miip     | - |
| 20 | 7  | 24585591 | 24585647 | 3 | 2.23E-06 | 0.006586 | suggestive      | Zpf575        | - |
| 21 | 2  | 26138476 | 26138848 | 4 | 3.41E-06 | 0.009056 | suggestive      | C33006A16Rik  | - |
| 22 | 5  | 92809348 | 92809617 | 3 | 5.2E-06  | 0.012116 | suggestive      | Shroom3       | - |
| 23 | 9  | 83441051 | 83447797 | 4 | 5.72E-06 | 0.012869 | suggestive      | Gm2087; Lca5  | - |
| 24 | 10 | 74991426 | 74992072 | 5 | 6.02E-06 | 0.013131 | suggestive      | Gnaz          | - |
| 25 | 18 | 37504353 | 37507000 | 3 | 6.41E-06 | 0.013319 | suggestive      | Pcdhb20       | - |
| 26 | 5  | 52515778 | 52516161 | 3 | 7.18E-06 | 0.014233 | suggestive      | no transcript | - |
| 27 | 13 | 75089781 | 75090113 | 4 | 7.29E-06 | 0.014235 | suggestive      | Pcsk1         | + |
| 28 | 8  | 1.1E+08  | 1.1E+08  | 3 | 1.01E-05 | 0.018797 | not significant | Atxn1         | - |
| 29 | 14 | 28509713 | 28511587 | 4 | 1.26E-05 | 0.02266  | not significant | Wnt5a         | - |
| 30 | 15 | 28509713 | 28511587 | 4 | 1.26E-05 | 0.02266  | not significant | Mir3080       | - |

**Sv129Ev**

| Order | Chr | Start | Stop | Probes in DMR | p-value | BH-adjusted pvalue | level of significance | Gene name (UCSC) | Direction of association with ref group |
|-------|-----|-------|------|---------------|---------|--------------------|-----------------------|------------------|-----------------------------------------|
|-------|-----|-------|------|---------------|---------|--------------------|-----------------------|------------------|-----------------------------------------|

|    |    |          |          |    |          |          |                 |                        |   |
|----|----|----------|----------|----|----------|----------|-----------------|------------------------|---|
| 1  | 2  | 1.2E+08  | 1.2E+08  | 9  | 1.41E-11 | 1.87E-06 | significant     | Nusap1; Oip5           | + |
| 2  | 4  | 53713974 | 53714290 | 4  | 2.70E-09 | 0.000179 | significant     | fukutin                | - |
| 3  | Y  | 1244883  | 1246228  | 24 | 1.43E-08 | 0.000634 | significant     | Uty                    | - |
| 4  | 18 | 7001626  | 7002659  | 4  | 1.13E-07 | 0.003758 | suggestive      | mohawk homeobox        | + |
| 5  | 11 | 8624579  | 8624816  | 3  | 1.96E-07 | 0.005207 | suggestive      | no transcript          | + |
| 6  | 17 | 43952988 | 43953329 | 3  | 5.28E-07 | 0.011685 | suggestive      | Rcan2                  | + |
| 7  | 1  | 74881981 | 74882496 | 3  | 8.63E-07 | 0.016369 | suggestive      | Fev                    | + |
| 8  | 11 | 19998090 | 19998317 | 3  | 3.78E-06 | 0.062761 | suggestive      | Spred2                 | + |
| 9  | 4  | 54966184 | 54966261 | 3  | 7.63E-06 | 0.088525 | suggestive      | no transcript          | + |
| 10 | 11 | 1.01E+08 | 1.01E+08 | 3  | 0.000008 | 0.088525 | suggestive      | no transcript          | + |
| 11 | 5  | 24591271 | 24592735 | 6  | 9.68E-06 | 0.098884 | suggestive      | Smardc3; Mir671; Chpf2 | + |
| 12 | 11 | 94149106 | 94149327 | 3  | 1.43E-05 | 0.126854 | not significant | no transcript          | + |
| 13 | 17 | 20078475 | 20114625 | 4  | 2.75E-05 | 0.19152  | not significant | no transcript          | + |
| 14 | 5  | 33953872 | 33954009 | 3  | 3.05E-05 | 0.19152  | not significant | no transcript          | + |
| 15 | 10 | 93165836 | 93167508 | 3  | 3.08E-05 | 0.19152  | not significant | no transcript          | + |
| 16 | 15 | 38471763 | 38472349 | 3  | 3.17E-05 | 0.19152  | not significant | no transcript          | + |
| 17 | 4  | 1.4E+08  | 1.4E+08  | 3  | 3.88E-05 | 0.223723 | not significant | no transcript          | + |
| 18 | 14 | 33348991 | 33348992 | 4  | 5.13E-05 | 0.283524 | not significant | no transcript          | + |
| 19 | 8  | 34123616 | 34143338 | 3  | 5.49E-05 | 0.291366 | not significant | Leprotl1; Mboat4       | + |
| 20 | 8  | 87093185 | 87158380 | 7  | 5.86E-05 | 0.299014 | not significant | no transcript          | + |
| 21 | 17 | 26431938 | 26432317 | 4  | 6.48E-05 | 0.318454 | not significant | Neur11b                | - |
| 22 | 3  | 89316130 | 89316731 | 4  | 7.74E-05 | 0.350622 | not significant | Efna3                  | + |
| 23 | 12 | 20845590 | 20847186 | 5  | 8.32E-05 | 0.350622 | not significant | no transcript          | + |
| 24 | 10 | 40548879 | 40570576 | 5  | 8.36E-05 | 0.350622 | not significant | Slc22a16               | - |
| 25 | 2  | 1.31E+08 | 1.31E+08 | 5  | 1.01E-04 | 0.375577 | not significant | 1700037H04Rik          | - |
| 26 | 9  | 58077454 | 58079444 | 3  | 1.02E-04 | 0.375577 | not significant | Ccdc33                 | + |

|           |    |          |          |    |          |          |                 |               |   |
|-----------|----|----------|----------|----|----------|----------|-----------------|---------------|---|
| <b>27</b> | 14 | 73142650 | 73143769 | 6  | 1.16E-04 | 0.406927 | not significant | Rcbtb2        | + |
| <b>28</b> | Y  | 1285077  | 1286761  | 19 | 1.27E-04 | 0.41983  | not significant | Ddx3y         | - |
| <b>29</b> | 4  | 1.41E+08 | 1.41E+08 | 3  | 1.31E-04 | 0.41983  | not significant | no transcript | - |
| <b>30</b> | 10 | 84760085 | 84760211 | 3  | 1.39E-04 | 0.429459 | not significant | no transcript | + |

**Table S8.** Top differentially methylated regions (DMRs) within each strain in comparisons between DAI groups. Significant = p values below the genome-wide significant threshold ( $p < 5e-08$ ); suggestive = p values between the genome-wide significant threshold and the suggestive threshold ( $5e-08 < p < 1e-05$ ); not significant = p values above the suggestive threshold ( $p > 1e-05$ ). Chr = chromosome; DMR = differentially methylated region; BH = Benjamini-Hochberg.

| Strain      | Mean (mo) | Min (mo) | Max (mo) | Resource        |
|-------------|-----------|----------|----------|-----------------|
| 129/J       | 22.32     | Na       | na       | (4)             |
| 129/Sv      | 23.31     | 10       | 33.11    | (5)             |
| 129S1/SvImJ | 28.86     | 17.56    | 36.23    | Phenome.jax.org |
| 129S1/SvImJ | 28.99     | Na       | na       | (6)             |
| 129S1/SvImJ | 28.99     | Na       | 34.32    | (7)             |
| C57BL/6J    | 29.39     | 23.21    | 37.48    | Phenome.jax.org |
| C57BL/6J    | 29.62     | Na       | na       | (6)             |
| C57BL/6J    | 29.62     | Na       | 34.88    | (7)             |
| C57BL/6J    | 22.22     | Na       | na       | (4)             |
| Harlan CD1  | 27.1      | 13       | 32       | (8)             |
| ICD-CD1     | 25.08     | Na       | na       | (9)             |
| Swiss-CD1   | 21.86     | 8.51     | 29.91    | (10)            |

**Table S9.** Strain survival in standard housing

## SI References

1. M. Razzoli, *et al.*, Social stress shortens lifespan in mice. *Aging Cell* **17** (2018).
2. A. Fabregat, *et al.*, Reactome pathway analysis: a high-performance in-memory approach. *BMC Bioinformatics* **18**, 142 (2017).
3. G. Gao, W. Wan, S. Zhang, D. T. Redden, D. B. Allison, Testing for differences in distribution tails to test for differences in “maximum” lifespan (2008) <https://doi.org/10.1186/1471-2288-8-49>.
4. J. B. Storer, Longevity and gross pathology at death in 22 inbred mouse strains. *J Gerontol* **21**, 404–409 (1966).
5. V. N. Anisimov, *et al.*, Sex differences in aging, life span and spontaneous tumorigenesis in 129/Sv mice neonatally exposed to metformin. *Cell Cycle* **14**, 46–55 (2015).
6. R. Yuan, *et al.*, Aging in inbred strains of mice: study design and interim report on median lifespans and circulating IGF1 levels. *Aging Cell* **8**, 277–287 (2009).
7. R. Yuan, L. L. Peters, B. Paigen, Mice as a mammalian model for research on the genetics of aging. *ILAR J* **52**, 4–15 (2011).
8. M. A. Ray, N. A. Johnston, S. Verhulst, R. A. Trammell, L. A. Toth, Identification of markers for imminent death in mice used in longevity and aging research. *J Am Assoc Lab Anim Sci* **49**, 282–288 (2010).
9. H. Kobayashi, I. Martínez de Toda, L. Sanz-San Miguel, M. De la Fuente, Sex-related differences in behavioural markers in adult mice for the prediction of lifespan. *Biogerontology* **22**, 49–62 (2021).
10. S. M, *et al.*, Sucralose administered in feed, beginning prenatally through lifespan, induces hematopoietic neoplasias in male swiss mice. *Int J Occup Environ Health* **22**, 7–17 (2016).
